# Supplementary material for: Drug Related Problems among Older Inpatients at a Tertiary Care Setting
Source: MDPI journal article supplement (doi:10.3390/jcm13061638), 2024-03-13
Supplement: s1 [file s1]

**Table S1. Potentially inappropriate medications of the population study according to the 2019 Beer Criteria**

| <b>Category of PIMs</b>                                                            | <b>PIMs (n=612)<br/>N (%)</b> |
|------------------------------------------------------------------------------------|-------------------------------|
| <b>PIMs following Beer criteria 2019</b>                                           | 612 (100)                     |
| <b>PIMs Independence of Medical Condition</b>                                      | 324 (52.9)                    |
| Proton pump inhibitors                                                             | 106 (17.3)                    |
| Benzodiazepines                                                                    | 59 (9.6)                      |
| Anticholinergics                                                                   | 59 (9.6)                      |
| <b>PIMs due to Drug-Disease or Drug-Syndrome Interactions</b>                      | 70 (11.4)                     |
| Benzodiazepines                                                                    | 26 (4.2)                      |
| Antiepileptics                                                                     | 13 (2.1)                      |
| Opioids                                                                            | 12 (1.9)                      |
| <b>Drugs to be used with caution in older adults</b>                               | 183 (29.9)                    |
| Diuretics                                                                          | 70 (11.4)                     |
| Trimethoprim-sulfamethoxazole                                                      | 22 (3.6)                      |
| Antipsychotics                                                                     | 13 (2.1)                      |
| <b>PIMs due to drug-drug interactions</b>                                          | 8 (1.3)                       |
| Amitriptyline-Orphenadrine                                                         | 2 (0.3)                       |
| Amiodarone-Warfarin                                                                | 1 (0.2)                       |
| Orphenadrine-Cetirizine                                                            | 1 (0.2)                       |
| <b>Drugs to be adjusted in older adults with varying levels of kidney function</b> | 27 (4.4)                      |
| Gabapentin                                                                         | 6 (0.9)                       |
| Pregabalin                                                                         | 5 (0.8)                       |
| Bactrim                                                                            | 4 (0.6)                       |

**Data are presented as n (%)**

**Abbreviations:** PIM, potentially inappropriate medication.
