# Supplementary material for: Drug Related Problems among Older Inpatients at a Tertiary Care Setting
Source: MDPI journal article supplement (doi:10.3390/jcm13061638), 2024-03-13
Supplement: s1 [file s1]

**Table S2. Lists of most common drug interactions with potential effects according to Micromedex Drug Interaction Database**

| Drug combination                      | Potential effects                                                                                | (n=1210)<br>N (%) |
|---------------------------------------|--------------------------------------------------------------------------------------------------|-------------------|
| <b>Major drug interactions</b>        |                                                                                                  |                   |
| Amlodipine + Simvastatin              | Increased risk of myopathy and rhabdomyolysis                                                    | 36 (2.9)          |
| Aspirin + Clopidogrel                 | Increased risk of bleeding                                                                       | 26 (2.1)          |
| Clopidogrel + Omeprazole              | Reduced plasma concentrations of clopidogrel active metabolite and reduced antiplatelet activity | 24 (1.9)          |
| Aspirin + Furosemide                  | Decreased diuretic effectiveness and increased nephrotoxicity                                    | 16 (1.3)          |
| Aspirin + Enoxaparin                  | Increased risk of bleeding                                                                       | 9 (0.7)           |
| <b>Moderate drug interactions</b>     |                                                                                                  |                   |
| Atorvastatin + Clopidogrel            | Decreased formation of clopidogrel active metabolite                                             | 34 (2.8)          |
| Aspirin + Calcium                     | Decreased salicylate effectiveness                                                               | 22 (1.8)          |
| Aspirin + Carvedilol                  | Increased blood pressure                                                                         | 17 (1.4)          |
| Ferrous + Omeprazole                  | Reduced non-heme iron bioavailability                                                            | 17 (1.4)          |
| Aspirin + Insulin                     | Increased risk of hypoglycemia                                                                   | 16 (1.3)          |
| <b>Minor drug interactions</b>        |                                                                                                  |                   |
| Calcium carbonate + Ferrous fumarate  | Decreased iron effectiveness                                                                     | 26 (2.1)          |
| Ferrous fumarate + Sodium bicarbonate | Decreased iron effectiveness                                                                     | 19 (1.6)          |
| Furosemide + Hydralazine              | Enhanced diuretic response to furosemide                                                         | 12 (0.9)          |
| Cyanocobalamin + Omeprazole           | Decreased cyanocobalamin absorption                                                              | 11 (0.9)          |

**Data are presented as n (%)**
