# Supplementary material for: Drug Related Problems among Older Inpatients at a Tertiary Care Setting
Source: MDPI journal article supplement (doi:10.3390/jcm13061638), 2024-03-13
Supplement: s1 [file s1]

**Table S6. Preventability of adverse drug events**

| Category of preventability                             | ADEs (n=27) |
|--------------------------------------------------------|-------------|
|                                                        | N (%)       |
| <b>Preventable ADEs</b>                                | 10 (37.0)   |
| LGIB from warfarin                                     | 1 (3.7)     |
| UGIB from enoxaparin                                   | 2 (7.4)     |
| UGIB from dabigatran                                   | 1 (3.7)     |
| Hematuria from enoxaparin                              | 1 (3.7)     |
| Intraabdominal bleeding from warfarin                  | 1 (3.7)     |
| Myopathy from colchicine                               | 1 (3.7)     |
| Lactic acidosis and acute kidney injury from metformin | 1 (3.7)     |
| Alteration of consciousness from vitamin D             | 1 (3.7)     |
| Neutropenia from methotrexate                          | 1 (3.7)     |

**Data are presented as n (%)**

**Abbreviations:** ADE, adverse drug event; LGIB, lower gastrointestinal bleeding; UGIB, upper gastrointestinal bleeding
