# Supplementary material for: Drug Related Problems among Older Inpatients at a Tertiary Care Setting
Source: MDPI journal article supplement (doi:10.3390/jcm13061638), 2024-03-13
Supplement: s1 [file s1]

**Table S5. Category of medications associated with adverse drug events**

| Category of medications associated with ADEs | ADEs (n=27) |
|----------------------------------------------|-------------|
|                                              | N (%)       |
| A10 Drug used in diabetes                    | 1 (3.7)     |
| A11 Vitamins                                 | 1 (3.7)     |
| B01 Antithrombotic agents                    | 6 (22.2)    |
| C02 Antihypertensives                        | 1 (3.7)     |
| C10 Lipid modifying agents                   | 1 (3.7)     |
| J01 Antibacterial drugs                      | 1 (3.7)     |
| J05 Antivirals for systemic use              | 1 (3.7)     |
| L01 Antineoplastic agents                    | 13 (48.1)   |
| L04 Immunosuppressants                       | 1 (3.7)     |
| M04 Antigout preparations                    | 1 (3.7)     |

**Data are presented as n (%)**

**Abbreviations:** ADE, adverse drug event
