# Supplementary material for: Drug Related Problems among Older Inpatients at a Tertiary Care Setting
Source: MDPI journal article supplement (doi:10.3390/jcm13061638), 2024-03-13
Supplement: s1 [file s1]

**Table S3. Severity of adverse drug events**

| Category of ADEs' severity            | ADE (n=27)      |
|---------------------------------------|-----------------|
|                                       | N (%)           |
| Grade 1 Mild                          | 0 (0)           |
| Grade 2 Moderate                      | 0 (0)           |
| Grade 3 Severe                        | 15 (55.6)       |
| Grade 4 Life-threatening consequences | 12 (44.4)       |
| Grade 5 Death related to ADE          | 0 (0)           |
| <b>Total ADEs</b>                     | <b>27 (100)</b> |

**Data are presented as n (%)**

**Abbreviations:** ADE, adverse drug event
