# Supplementary material for: Drug Related Problems among Older Inpatients at a Tertiary Care Setting
Source: MDPI journal article supplement (doi:10.3390/jcm13061638), 2024-03-13
Supplement: s1 [file s1]

**Table S4. Category of adverse drug events**

| Types of ADEs                                                                                                                                                                                         | ADE (n=27)<br>N (%)                                                                        |
|-------------------------------------------------------------------------------------------------------------------------------------------------------------------------------------------------------|--------------------------------------------------------------------------------------------|
| <b>Neurological problems</b><br>Alteration of consciousness<br>Myopathy                                                                                                                               | 2 (7.4)<br>1 (3.7)<br>1 (3.7)                                                              |
| <b>Skin problems</b><br>Anaphylactic shock with rash                                                                                                                                                  | 1 (3.7)<br>1 (3.7)                                                                         |
| <b>Respiratory problems</b><br>Pneumonitis<br>Diffuse interstitial lung disease                                                                                                                       | 2 (7.4)<br>1 (3.7)<br>1 (3.7)                                                              |
| <b>Cardiovascular problems</b><br>Pericarditis<br>Congestive heart failure                                                                                                                            | 2 (7.4)<br>1 (3.7)<br>1 (3.7)                                                              |
| <b>Renal problems</b><br>Lactic acidosis with acute kidney injury                                                                                                                                     | 1 (3.7)<br>1 (3.7)                                                                         |
| <b>Hematological problems</b><br>Pancytopenia<br>Agranulocytosis<br>Intraabdominal bleeding<br>Febrile neutropenia<br>Hematuria<br>Upper gastrointestinal bleeding<br>Lower gastrointestinal bleeding | 19 (70.4)<br>3 (11.1)<br>3 (11.1)<br>1 (3.7)<br>7 (25.9)<br>1 (3.7)<br>3 (11.1)<br>1 (3.7) |

**Data are presented as n (%)**

**Abbreviations:** ADE, adverse drug event
