# Supplementary material for: Drug Related Problems among Older Inpatients at a Tertiary Care Setting
Source: J Clin Med. 2024 Mar 13;13(6):1638. doi: 10.3390/jcm13061638 (PMC10971276; doi:10.3390/jcm13061638)
Supplement: Supplementary file 1 [file jcm-13-01638-s001.zip]

Archive with 6 entries (6 files):
- Table S1. Potentially inappropriate medications of the population study according to the 2019 Beer Criteria_JCM.pdf
- Table S2. Lists of most common drug interactions with potential effects according to Micromedex Drug Interaction Database_JCM.pdf
- Table S3. Severity of adverse drug events_JCM.pdf
- Table S4. Category of adverse drug events_JCM.pdf
- Table S5. Category of medications associated with adverse drug events_JCM.pdf
- Table S6. Preventability of adverse drug events_JCM.pdf
